# Supplementary material
Source: Springer Nature journal article supplement (https://www.springermedizin.de/resource/supplementary/12913_2009_1150_MOESM4_ESM.pdf/9527734)

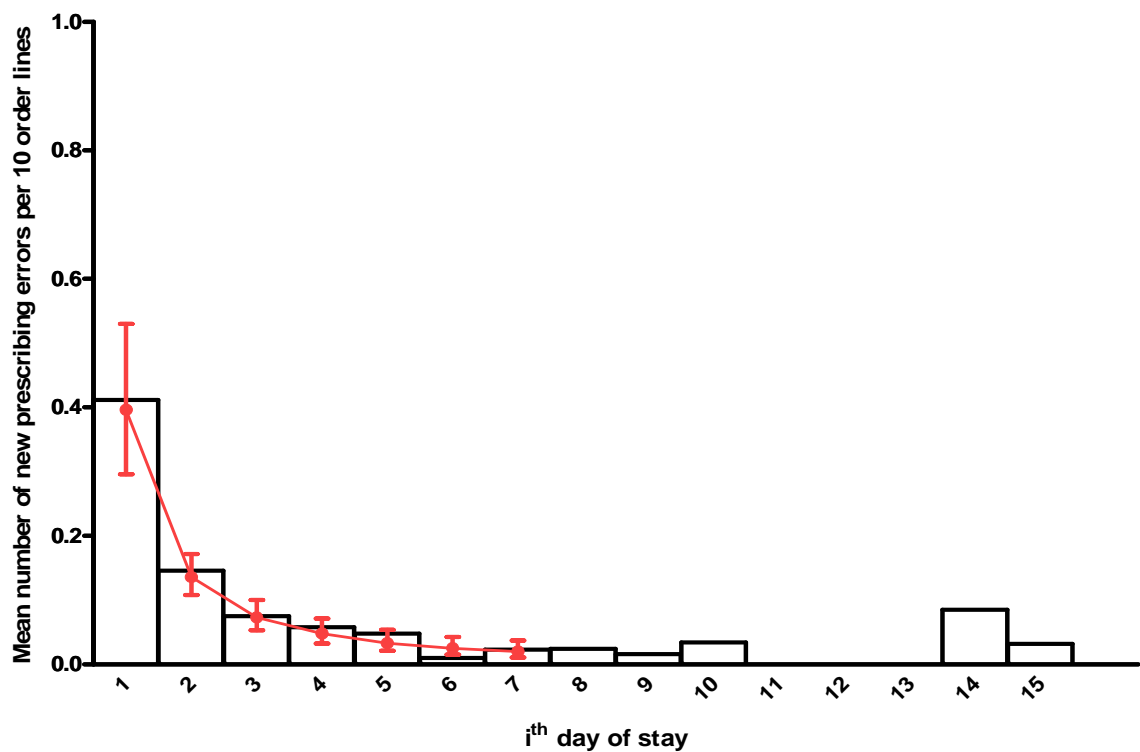

|                                   |      |      |      |      |      |     |     |     |     |     |     |     |     |     |     |
|-----------------------------------|------|------|------|------|------|-----|-----|-----|-----|-----|-----|-----|-----|-----|-----|
| <b>New error cases</b>            | 60   | 22   | 11   | 7    | 5    | 1   | 2   | 2   | 1   | 2   | 0   | 0   | 0   | 3   | 1   |
| <b>Order lines prescription</b>   | 1455 | 1510 | 1469 | 1207 | 1044 | 959 | 883 | 821 | 633 | 589 | 498 | 421 | 377 | 351 | 316 |
| <b>Stays with incident errors</b> | 44   | 21   | 10   | 6    | 5    | 1   | 2   | 2   | 1   | 2   | 0   | 0   | 0   | 2   | 1   |

Supplement: MOESM4 [file 9527734]
